# Supplementary material for: Tissue-resident macrophages in the intestine are long lived and defined by Tim-4 and CD4 expression
Source: PubMed Central journal article supplement (PMC5987925; doi:10.1084/jem.20180019), 2018-06-04
Supplement: JEM_20180019_sm.pdf [file JEM_20180019_sm.pdf]

Supplemental material

Shaw et al., <https://doi.org/10.1084/jem.20180019>

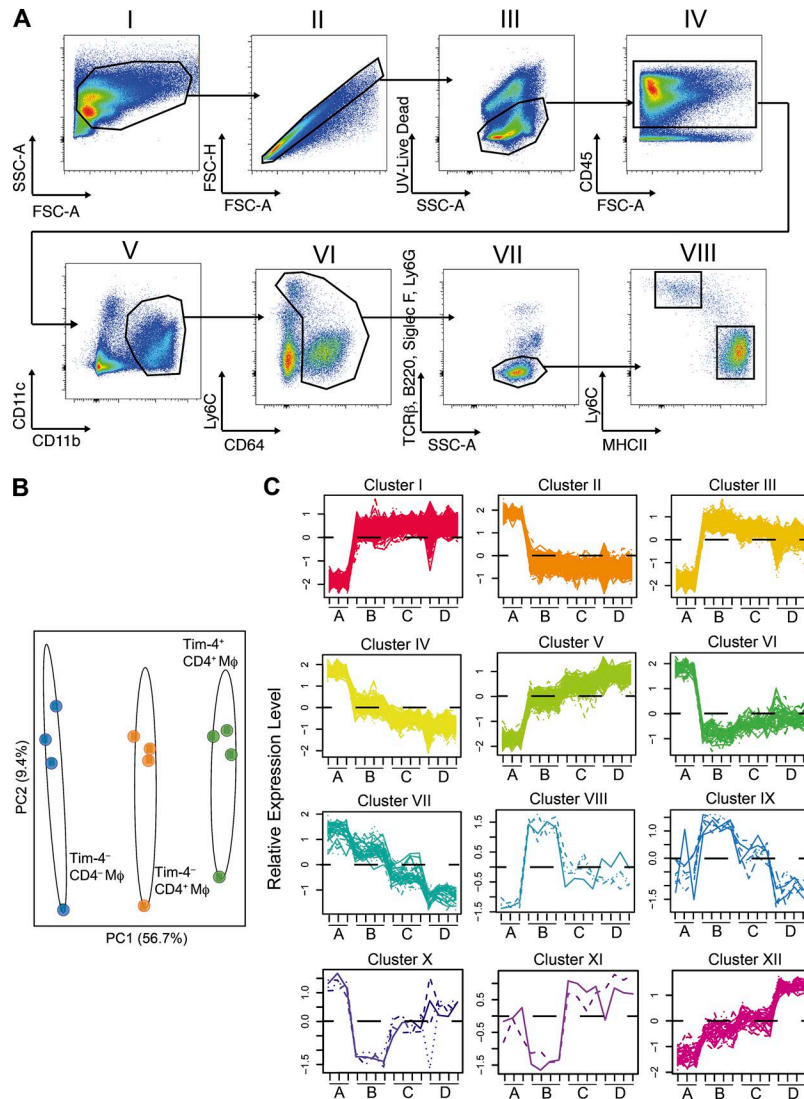

Figure S1. **Gating of gut macrophages and cluster analysis of Ly6C<sup>hi</sup> blood monocytes and gut macrophages.** (A) Flow cytometry gating strategy for monocytes and macrophages in single-cell suspensions of combined lamina propria and muscularis. Cells were identified as follows: (I) Side scatter area (SSC-A) versus forward scatter area (FSC-A) to remove cellular debris; (II) forward scatter height (FSC-H) versus FSC-A for doublet exclusion; (III) Live-Dead versus SSC-A to identify live cells; (IV) CD45 versus FSC-A to define hematopoietic populations; (V and VI) CD11c versus CD11b and Ly6C versus CD64 to enrich for monocytes and macrophages; (VII) lineage versus SSC-A to exclude contaminating nonmonocyte and macrophage populations; and (VIII) Ly6C versus MHCII to visualize monocyte-to-macrophage waterfall. (B) PCA of global gene expression from Tim-4<sup>-</sup>CD4<sup>-</sup>, Tim-4<sup>-</sup>CD4<sup>+</sup>, and Tim-4<sup>+</sup>CD4<sup>+</sup> resident macrophages isolated by FACS from the small intestine of 8–10-wk-old C57BL/6 WT mice. (C) Graphical representation of gene expression profiles for each cluster of differentially expressed genes established by k-means. Samples and sequencing were generated as described in Fig. 1D. Cell populations: A, Ly6C<sup>hi</sup> blood monocytes; B, Tim-4<sup>-</sup>CD4<sup>-</sup> macrophages; C, Tim-4<sup>-</sup>CD4<sup>+</sup> macrophages; D, Tim-4<sup>+</sup>CD4<sup>+</sup> macrophages.

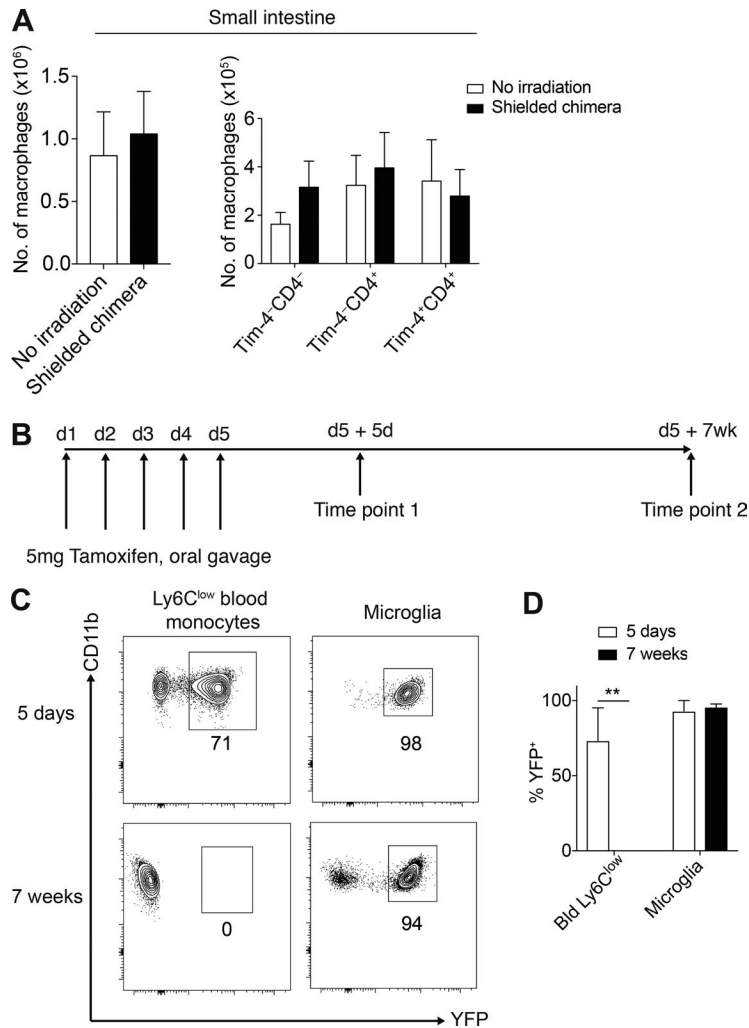

Figure S2. Gut macrophage populations in gut-shield chimeras and YFP expression over time in Ly6C<sup>low</sup> monocytes and microglia of *Cx3cr1CreER* x *R26-yfp* animals. **(A)** Total number of macrophages and of Tim-4<sup>-</sup>CD4<sup>-</sup>, Tim-4<sup>-</sup>CD4<sup>+</sup>, and Tim-4<sup>+</sup>CD4<sup>+</sup> macrophage subsets in small intestines of gut-shielded chimeras generated as described in Fig. 3 A at 7 wk after irradiation. Data are pooled from two experiments. *n* = 5–6 per group. **(B)** Schematic of tamoxifen administration and experimental endpoints in *Cx3cr1CreER*-crossed *R26-yfp* animals. **(C)** YFP reporter expression at 5 d and 7 wk after treatment with tamoxifen as shown in B in Ly6C<sup>low</sup> blood monocytes and brain microglia. Numbers denote the percentages of cells within the gate. **(D)** Frequency of YFP<sup>+</sup> cells in Ly6C<sup>low</sup> blood monocytes and brain microglia after treatment with tamoxifen as shown in B. Data are pooled from two independent experiments. *n* = 4–5 per group. Error bars show means ± SD. Statistical comparisons were performed with two-way Student's *t* test with Welch's correction: \*\*, *P* < 0.01.

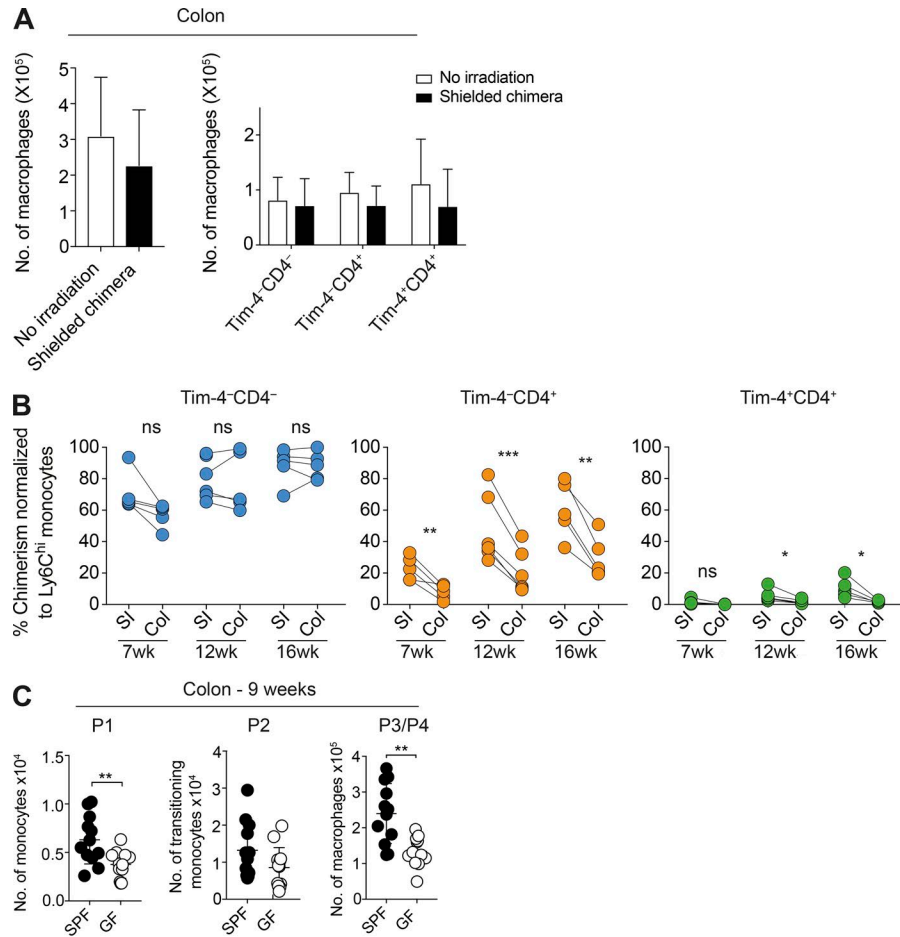

Figure S3. **Gut macrophage populations in gut-shield chimeras and reduced numbers of monocytes and macrophages in the colon of GF animals compared with SPF controls.** (A) Total number of macrophages and of Tim-4<sup>-</sup>CD4<sup>-</sup>, Tim-4<sup>-</sup>CD4<sup>+</sup>, and Tim-4<sup>+</sup>CD4<sup>+</sup> macrophage subsets in the colon of gut-shielded chimeras generated as described in Fig. 3 A at 7 wk after irradiation. Data are pooled from two experiments.  $n = 5-6$  per group. (B) At 7, 12, and 16 wk after irradiation, the frequency of donor-derived cells was determined in the intestinal Ly6C<sup>hi</sup> monocyte and gut macrophage subpopulations of the small intestine (SI) and colon (Col) by flow cytometry and normalized to the chimerism of Ly6C<sup>hi</sup> blood monocytes. Paired data from individual mice from at least two independent experiments are shown.  $n = 5$  or 6 per group. Results for individual animals are shown as dots. (C) Total number of monocytes (P1), transitioning monocyte to macrophages cells (P2), and macrophages (P3/P4) within the colon of SPF and GF mice at 9 wk of age. Data are pooled from four independent experiments.  $n = 12$  per group; results for individual animals are shown as dots. Error bars show means  $\pm$  SD. Statistical comparisons were performed with two-way Student's *t* test with (C) or without (B) Welch's correction: \*,  $P \leq 0.05$ ; \*\*,  $P \leq 0.01$ ; \*\*\*,  $P \leq 0.001$ .

Table S1. **GO terms by cluster**

| <b>Cluster</b> | <b>GO terms more than twofold enriched and P &lt; 0.05</b>                                                                                                                                                                                                                                                                                                                                                                                                                                                                                                                                         |
|----------------|----------------------------------------------------------------------------------------------------------------------------------------------------------------------------------------------------------------------------------------------------------------------------------------------------------------------------------------------------------------------------------------------------------------------------------------------------------------------------------------------------------------------------------------------------------------------------------------------------|
| I              | Protein ADP-ribosylation, cell growth, locomotion, response to abiotic stimulus, extracellular transport, negative regulation of apoptotic process, transmembrane receptor protein tyrosine kinase signaling pathway, phagocytosis, cell-cell adhesion, cytokine-mediated signaling pathway, cellular component movement, response to biotic stimulus, response to endogenous stimulus, B cell-mediated immunity, cell adhesion, biological adhesion, endocytosis, cell proliferation, MAPK cascade, and blood coagulation                                                                         |
| II             | Pentose-phosphate shunt, glycolysis, JNK cascade, lipid transport, I- $\kappa$ B kinase/NF- $\kappa$ B cascade, cellular defense response, negative regulation of apoptotic process, sensory perception of sound, calcium-mediated signaling, regulation of cell cycle, cytokinesis, intracellular signal transduction, cytokine-mediated signaling pathway, regulation of phosphate metabolic process, protein glycosylation, cellular amino acid metabolic process, and MAPK cascade                                                                                                             |
| III            | Antigen processing and presentation of peptide or polysaccharide antigen via MHC class II, antigen processing and presentation, DNA recombination, chromosome segregation, DNA replication, cellular defense response, meiosis, cell cycle, DNA repair, cytokinesis, macrophage activation, natural killer cell activation, lipid transport, regulation of cell cycle, immune system process, regulation of catalytic activity, regulation of molecular function, cytoskeleton organization, MAPK cascade, phosphate-containing compound metabolic process, cell adhesion, and biological adhesion |
| IV             | Unsaturated fatty acid biosynthetic process, acyl-CoA metabolic process, neuromuscular synaptic transmission, neurotransmitter secretion, cation transport, coenzyme metabolic process, regulation of catalytic activity, cytokine-mediated signaling pathway, regulation of molecular function, cellular defense response, cell adhesion, biological adhesion, ion transport, MAPK cascade, B cell-mediated immunity, and regulation of phosphate metabolic process                                                                                                                               |
| V              | Nitric oxide biosynthetic process, cyclic nucleotide metabolic process, cellular calcium ion homeostasis, homeostatic process, angiogenesis, locomotion, protein glycosylation, anatomical structure morphogenesis, regulation of molecular function, cell adhesion, biological adhesion, response to external stimulus, and cellular component movement                                                                                                                                                                                                                                           |
| VI             | Ferredoxin metabolic process, sensory perception of pain, asymmetric protein localization, antigen processing and presentation of peptide or polysaccharide antigen via MHC class II, antigen processing and presentation, purine nucleobase metabolic process, blood coagulation, cellular defense response, cell adhesion, biological adhesion, response to external stimulus, immune system process, and response to stress                                                                                                                                                                     |
| VII            | Regulation of vasoconstriction, phosphate ion transport, mammary gland development, cell-cell adhesion, blood circulation, phospholipid metabolic process, cell adhesion, biological adhesion, phosphate-containing compound metabolic process, and carbohydrate metabolic process                                                                                                                                                                                                                                                                                                                 |
| VIII           | Hemopoiesis, blood coagulation, macrophage activation, immune system process, cell proliferation, cell-cell adhesion, and cellular defense response                                                                                                                                                                                                                                                                                                                                                                                                                                                |
| IX             | JAK-STAT cascade, JNK cascade, induction of apoptosis, I- $\kappa$ B kinase/NF- $\kappa$ B cascade, negative regulation of apoptotic process, hemopoiesis, cellular defense response, cytokine-mediated signaling pathway, MAPK cascade, cell adhesion, biological adhesion, apoptotic process, cell death, death, mesoderm development, intracellular signal transduction, immune response, phosphate-containing compound metabolic process, developmental process, signal transduction, cell communication, and cellular process                                                                 |
| X              | Not determined                                                                                                                                                                                                                                                                                                                                                                                                                                                                                                                                                                                     |
| XI             | Hemopoiesis and B cell-mediated immunity                                                                                                                                                                                                                                                                                                                                                                                                                                                                                                                                                           |
| XII            | Response to toxic substance, blood coagulation, response to external stimulus, cell-cell adhesion, biological adhesion, macrophage activation, immune system process, visual perception, and heart development                                                                                                                                                                                                                                                                                                                                                                                     |

Table S2. Gene lists by cluster

| Cluster   | Genes                                                                                                                                                                                                                                                                                                                                                                                                                                                                                                                                                                                                                                                                                                                                                                                                                                                                                                                                                                                                                                                                                                                                                                                                                                                                                                                                                                                                                                                                                                                                                                                                                                                                                                                                                                                                                                                                                                                                                                                                                                                                                                                                                                                                                                                                                                                                                                                                                                                                                                                                                                                                                                                                                                                                                                                                                                                                                                                                                                                                                                                                                                                                                                                                                                                                                                                                                                                                                                                                                                                                                                                                                                                                                                                                                                                                                                                                                                                                                                                                                                                                                                                                                                                                                                                                                                                                                                                                                                                                                                                                                                                                                                                                                                                                                                                                                                                                                                                                                                                                                                                                                                                                                                                                                                                                                                                                                                                                                                                                                                                                                                                                                                                                                                                                                                                                                                                                                                                                                                                                                                                                                                                                                                                                                                                                                                                                                                                                                                                                                                                                                                                                                                                                                                                                                                                                                                                                                                                                                                                                                                      |
|-----------|--------------------------------------------------------------------------------------------------------------------------------------------------------------------------------------------------------------------------------------------------------------------------------------------------------------------------------------------------------------------------------------------------------------------------------------------------------------------------------------------------------------------------------------------------------------------------------------------------------------------------------------------------------------------------------------------------------------------------------------------------------------------------------------------------------------------------------------------------------------------------------------------------------------------------------------------------------------------------------------------------------------------------------------------------------------------------------------------------------------------------------------------------------------------------------------------------------------------------------------------------------------------------------------------------------------------------------------------------------------------------------------------------------------------------------------------------------------------------------------------------------------------------------------------------------------------------------------------------------------------------------------------------------------------------------------------------------------------------------------------------------------------------------------------------------------------------------------------------------------------------------------------------------------------------------------------------------------------------------------------------------------------------------------------------------------------------------------------------------------------------------------------------------------------------------------------------------------------------------------------------------------------------------------------------------------------------------------------------------------------------------------------------------------------------------------------------------------------------------------------------------------------------------------------------------------------------------------------------------------------------------------------------------------------------------------------------------------------------------------------------------------------------------------------------------------------------------------------------------------------------------------------------------------------------------------------------------------------------------------------------------------------------------------------------------------------------------------------------------------------------------------------------------------------------------------------------------------------------------------------------------------------------------------------------------------------------------------------------------------------------------------------------------------------------------------------------------------------------------------------------------------------------------------------------------------------------------------------------------------------------------------------------------------------------------------------------------------------------------------------------------------------------------------------------------------------------------------------------------------------------------------------------------------------------------------------------------------------------------------------------------------------------------------------------------------------------------------------------------------------------------------------------------------------------------------------------------------------------------------------------------------------------------------------------------------------------------------------------------------------------------------------------------------------------------------------------------------------------------------------------------------------------------------------------------------------------------------------------------------------------------------------------------------------------------------------------------------------------------------------------------------------------------------------------------------------------------------------------------------------------------------------------------------------------------------------------------------------------------------------------------------------------------------------------------------------------------------------------------------------------------------------------------------------------------------------------------------------------------------------------------------------------------------------------------------------------------------------------------------------------------------------------------------------------------------------------------------------------------------------------------------------------------------------------------------------------------------------------------------------------------------------------------------------------------------------------------------------------------------------------------------------------------------------------------------------------------------------------------------------------------------------------------------------------------------------------------------------------------------------------------------------------------------------------------------------------------------------------------------------------------------------------------------------------------------------------------------------------------------------------------------------------------------------------------------------------------------------------------------------------------------------------------------------------------------------------------------------------------------------------------------------------------------------------------------------------------------------------------------------------------------------------------------------------------------------------------------------------------------------------------------------------------------------------------------------------------------------------------------------------------------------------------------------------------------------------------------------------------------------------------------------------------------------|
| Cluster I | <p>1700016P03Rik, 1810011H11Rik, 2510009E07Rik, 2610528A11Rik, 2900026A02Rik, 3110043O21Rik, 4833411C07Rik, 4930427A07Rik, 4930503L19Rik, 4930539E08Rik, 4931406C07Rik, 5031425F14Rik, 6330403L08Rik, 9430076C15Rik, 9930120I10Rik, A530099J19Rik, A930006K02Rik, A930011G23Rik, Abcc3, Abcg2, Abcg3, Abhd6, Ablim1, Acp2, Acp5, Acsf2, Actn1, Acvrl1, Acy1, Adam19, Adam22, Adam23, Adamts4, Adap2, Adck5, Adgre1, Adgrg5, Adgrl3, Adora3, Agap1, Agmo, Ahrr, Aif1, Akr1e1, Aldh1a1, Aldob, Alox5, Amacr, Amica1, Anks6, Ano8, Anpep, Antxr1, Antxr2, Aoah, Ap1b1, Apoe, Apol10b, Apol7c, Apold1, Arfgef2, Arhgap18, Arhgap19, Arhgap32, Arhgap33, Arhgap35, Arhgef12, Arhgef17, Arl4c, Arpin, Arrb2, Art2a-ps, Art2b, As3mt, Asah2, Asb2, Asgr2, Atad5, Atp6ap2, AU020206, AW112010, Axl, B130021K23Rik, B230217C12Rik, B3galnt1, B4galt6, Baiap2, Bank1, Basp1, Batf3, BC026585, BC049352, BC055324, Bcat2, Bcl2a1a, Bcl2a1b, Bcl2a1d, Bend6, Bhlhe40, Bin1, Bmp1, Bmp2, Brca2, Btbd19, Btg2, Btnl2, C1qa, C1qb, C1qc, C1ra, C1s1, C3ar1, C5ar1, C5ar2, C6, Cables1, Cadm1, Cald1, Camk1, Camk2a, Capn3, Car13, Car2, Card11, Cav1, Cbarp, Cbr1, Cbx6, Ccdc102a, Ccdc134, Ccdc157, Ccl12, Ccl3, Ccl4, Ccl7, Ccl8, Ccnd2, Ccnl1, Ccr1, Ccr5, Cd164, Cd1d1, Cd200r4, Cd209e, Cd22, Cd274, Cd276, Cd33, Cd6, Cd63, Cd72, Cd79a, Cd79b, Cd80, Cd81, Cd82, Cd83, Cd86, Cd9, Cdc42bpg, Cdc7, Cdc5, Cdk5rap2, Cdkn1a, Cdr2, Cela1, Cenpi, Cep152, Cep571, Cep68, Cep89, Chd3, Chd7, Chka, Chp2, Chpf, Chst15, Chst7, Chtf18, Cish, Clasp2, Clec1b, Clec4n, Clec9a, Clic4, Clmp, Clspn, Cmah, Cmk1r1, Cmtm4, Cmtm8, Cnrip1, Col14a1, Col15a1, Col18a1, Col1a1, Col3a1, Col4a1, Col4a2, Col5a1, Copz2, Cp, Cpeb4, Cpne2, Cpq, Creg2, Creld1, Crem, Crim1, Ctc1, Ctla2b, Ctsb, Ctsf, Ctstl, Ctso, Cttm, Cttnbp2nl, Cul7, Cxcl1, Cxcl14, Cxcl16, Cxcl2, Cxx1c, D8Ert82e, Dab2, Dclre1c, Ddit3, Ddx11, Ddx5, Decr2, Dennd1b, Derl3, Dgat1, Dhrr3, Dip2c, Dnaaf3, Dnajb2, Dnal1, Dnase1l3, Dnase2a, Dnmbp, Dock4, Dock6, Dock7, Dse, Dst, Dtl, Dtnbp1, Dtx4, Dusp1, Dusp8, Dynll2, Dyrk4, E2f1, Eef2k, Egr1, Ehhp1, Ehd1, Ehhadh, Enho, Enpp1, Enpp4, Enpp5, Entpd1, Eogt, Epb41l2, Ephx1, Ermap, Ets1, Ets2, Etv5, Eva1b, Exoc3l4, F11r, F2r, F3, F830016B08Rik, Fads1, Fads2, Fads3, Fam110b, Fam134b, Fam149a, Fam213a, Fam234b, Fam3c, Fam46c, Fblim1, Fbln1, Fcgrt, Fchsd2, Fcrlb, Fgd2, Fgf11, Fgfr1l, Fggy, Fgl2, Fhad1, Fhl1, Flnb, Fmn1, Fmnl2, Fmnl3, Fnpb1, Fos, Fosb, Frmd4b, Fscn1, Fth1, G530011O06Rik, Gaa, Gabbr1, Gadd45b, Gadd45g, Galnt12, Gas2l3, Gas6, Gatm, Gbgt1, Gbp2b, Gdf15, Gdpl1, Gdpl5, Gga2, Ggt5, Gimap1, Gimap3, Gimap4, Gimap6, Gla, Gm10134, Gm13431, Gm15344, Gm15523, Gm17024, Gm17971, Gm19434, Gm20056, Gm20186, Gm33280, Gm37347, Gm44250, Gm44292, Gm44861, Gm44950, Gm45043, Gm6377, Gna12, Gnaq, Gns, Got1, Gpr155, Gpr171, Gpr31b, Gpr34, Gpr55, Gpr65, Grap, Gsg1, Gstm5, Gtse1, H2-Oa, Hap1, Haus3, Hcar2, Hebp1, Herpud1, Hes1, Hexdc, Hfe, Hic1, Hilpda, Hlx, Hmces, Hmecn2, Hmgn1, Hmgn2, Hook2, Hpgds, Hpn, Hrh1, Hs2st1, Hs3st3b1, Hspa5, Htra1, Htra3, Hvcn1, Icosl, Idh2, Ier3, Ifi27, Igf1, Igfbp4, Igfbp7, Igha, Ighd, Ighj2, Ighv1-18, Ighv1-19, Ighv1-26, Ighv1-39, Ighv1-76, Ighv2-2, Ighv3-6, Igkc, Igkv1-110, Igkv10-96, Igkv5-43, Igkv5-48, Igkv6-23, Iglc1, Iglv1, Igsf8, Il10, Il10rb, Il11ra1, Il1bos, Il1r2, Il1rl2, Il4i1, Impact, Impdh2, Inpp4b, Inpp5j, Insig1, Insl6, Intu, Ipo13, Iqgap3, Irak2, Irf2bp2, Irs2, Ispd, Itga9, Itgax, Itgb5, Itih5, Itm2c, Itsn1, vns1abp, Jade2, Jag2, Jchain, Jun, Junb, Jund, Jup, Kank2, Kazn, Kcng2, Kcnip3, Kcnj10, Kcnk13, Kcnk6, Kctd12, Kdelc2, Kif13b, Kif19a, Kifap3, Kitl, Klr1b, Kpnb1, Kynu, L2hgdh, Lacc1, Lag3, Lair1, Lamb2, Lclat1, Lgmn, Lira5, Lix1, Lmna, Loxl3, Lpar1, Lpar6, Lpcat2, Lrch1, Lrp12, Lrp6, Ltbp1, Ltc4s, Ltzs2, Ltzs3, Mab21l3, Maf, Mafb, Mag, Maged1, Maged2, Maml2, Man1a, Mansc1, March8, Marcks, Mbd4, Mcm8, Mdfc, Megf8, Meis3, Mertk, Mgat4, Mgat5, Mgl2, Mical2, Mir5107, Mmd, Mmp13, Mmp14, Mmp2, Mmp9, Mplz3, Mras, Mrc1, Mrvl1, Ms4a14, Ms4a7, Mt1, Mturn, Mvb12b, Mxd1, Mxra7, Myh10, Myh11, Myl9, Mylk, Myo1b, Myo1e, Myom1, Nab2, Nbl1, Ncapg2, Nckap1, Ncoa4, Ndc1, Ndfip1, Ndst1, Nedd4, Negr1, Nek6, Neo1, Neurl1a, Neurl3, Nfe2l2, Nfkbid, Ngfrap1, Nlrp1c-ps, Notch4, Nphp1, Npl, Nr1h3, Nt5c3b, Ntn4, Ntprc, Nuak1, Nudt9, Odc1, Olfml3, Ophn1, Osbp1la, Osm, Otub2, P2rx4, P2rx6, P2rx7, P2ry12, P2ry13, P2ry14, P2ry6, P3h2, P3h3, Paip2b, Palb2, Pald1, Palld, Paqr9, Pcx, Pcyt1b, Pdccl1g2, Pde3b, Pde4b, Pdgfa, Pdgfb, Pdlim4, Pea15a, Pecr, Per1, Pf4, Pfkfb3, Pgf, Phf20, Pianp, Piggp, Pigz, Pilra, Pim3, Pkd1l2, Plcb2, Plcl1, Pld2, Pld3, Plekhg5, Plgrkt, Plk2, Plk3, Plpp3, Plvap, Plxdc2, Plxna3, Plxna4, Plxnb3, Pmaip1, Pmepa1, Pnrc1, Polq, Pon3, Pou6f1, Ppargc1b, Ppp1r12b, Ppp1r13b, Ppp1r15a, Ppp1r16b, Ppp3cc, Prdm1, Prim2, Prkar1b, Prnp, Procr, Prpf40b, Prr5, Prss30, Prune2, Psd3, Ptg1, Ptg2, Ptms, Ptp4a1, Ptpdc1, Ptpn23, Ptpv, Ptrf, PVRI, Pvr1, Pxdc1, Rab13, Rab20, Rab39, Rab3il1, Rab4a, Rad18, Ralgds, Ralgs1, Ralgs2, Rap1gap, Rasal3, Rasgrf2, Rasgrp1, Rbfox2, Rccd1, Rcn3, Rec8, Repts, Rfx5, Rgl1, Rgs1, Rgs10, Rgs12, Rhbdf1, Rhob, Rhobtb1, Rhoh, Rilpl2, Rnf122, Rnf180, Rogdi, RP23-220F20.2, RP23-312E2.1, RP24-92F8.4, Rpa1, Rpgrip1, Rtn1, Rundc3b, Runx1, Runx2, S1pr1, Saraf, Sash1, Sbf2, Scamp1, Scamp5, Scimp, Scn1b, Scn2b, Sdc4, Selk, Selm, Sema4c, Sema6d, Sepn1, Sepp1, Sept8, Serpina3f, Serpinb8, Serpinb9, Serpine1, Serping1, Sfmbt1, Sh3bp4, Sh3d19, Sh3pxd2a, Sh3pxd2b, Shmt1, Siae, Siglece, Siglecf, Ska2, Skil, Skp2, Slamf6, Slamf9, Slc11a2, Slc12a5, Slc15a3, Slc16a6, Slc19a1, Slc23a2, Slc25a10, Slc25a33, Slc26a11, Slc29a1, Slc2a8, Slc30a4, Slc35b2, Slc37a2, Slc39a8, Slc3a2, Slc44a1, Slc6a8, Slc7a4, Slc7a8, Slc9a3r2, Slc9a9, Slco2b1, Slco3a1, Slit1, Smad7, Smim3, Smo, Smpd3, Smyd4, Snhg15, Snn, Snx24, Snx5, Snx8, Soga1, Sorbs3, Sparc, Specc1l, Spg20, Spint1, Spire1, Spon1, Spred1, Spssb1, Spyt2d1, Src, Srxn1, St14, St18, St3gal6, Stab1, Stau2, Stk17b, Stra6l, Stx12, Stxbp1, Sult1a1, Susd1, Syne1, Tacc2, Taf9b, Tagln, Tanc1, Tanc2, Tbc1d10a, Tbc1d16, Tbc1d19, Tbc1d9, Tbrg1, Tbxas1, Tdrkh, Tesk1, Tex9, Tfrc, Tgfb1, Tgfb2, Thbs1, Timp3, Tiparp, Tk1, Tle2, Tle6, Tlr1, Tlr12, Tlr3, Tm4sf19, Tmcc3, Tmem106c, Tmem120b, Tmem132a, Tmem201, Tmem206, Tmem231, Tmem26, Tmem37, Tmem82, Tmem86a, Tmem88, Tmem8b, Tmem9, Tmx1, Tnfaip3, Tnfrsf11a, Tnfsf13b, Tnni3, Tns1, Tpbgl, Tpcn2, Tpm2, Trf, Trim37, Trim47, Trim7, Trip13, Trp53bp1, Trp53i11, Trp53inp2, Tsc22d1, Tsen2, Tsku, Tspan3, Tspan33, Tspan4, Tspyl2, Ttc21b, Ttc28, Ttc3, Ttc39b, Ttc8, Ttyh2, Tubb2a, Twsg1, Txlnb, Uap1l1, Ubc, Ube2t, Uevld, Uhrf1bp1, Ulk2, Unc13b, Unc5b, Usp11, Ust, Vav2, Vcam1, Vegfb, Vil1, Vipr1, Vprpb, Vps18, Vwf, Wbp5, Wdr6, Wdr60, Wdr90, Wwp1, Xrcc5, Xylt2, Zbtb10, Zbtb4, Zcwpw1, Zfp334, Zfp36, Zfp438, Zfp523, Zfp667, Zfp691, Zfp90, Zgrf1, Zmynd15, Znr3, Zranb3, Zscan18</p> |

Table S2. Gene lists by cluster (Continued)

| Cluster     | Genes                                                                                                                                                                                                                                                                                                                                                                                                                                                                                                                                                                                                                                                                                                                                                                                                                                                                                                                                                                                                                                                                                                                                                                                                                                                                                                                                                                                                                                                                                                                                                                                                                                                                                                                                                                                                                                                                                                                                                                                                                                                                                                                                                                                                                                                                                                                                                                                                                                                                                                                                                                                                                                                                                                                                                                                                                                                                                                                                                                                                                                                                                                                                                                                                                                                                                                                                                                                                                                                                                                                                                                                                                                                                                                                                                                                       |
|-------------|---------------------------------------------------------------------------------------------------------------------------------------------------------------------------------------------------------------------------------------------------------------------------------------------------------------------------------------------------------------------------------------------------------------------------------------------------------------------------------------------------------------------------------------------------------------------------------------------------------------------------------------------------------------------------------------------------------------------------------------------------------------------------------------------------------------------------------------------------------------------------------------------------------------------------------------------------------------------------------------------------------------------------------------------------------------------------------------------------------------------------------------------------------------------------------------------------------------------------------------------------------------------------------------------------------------------------------------------------------------------------------------------------------------------------------------------------------------------------------------------------------------------------------------------------------------------------------------------------------------------------------------------------------------------------------------------------------------------------------------------------------------------------------------------------------------------------------------------------------------------------------------------------------------------------------------------------------------------------------------------------------------------------------------------------------------------------------------------------------------------------------------------------------------------------------------------------------------------------------------------------------------------------------------------------------------------------------------------------------------------------------------------------------------------------------------------------------------------------------------------------------------------------------------------------------------------------------------------------------------------------------------------------------------------------------------------------------------------------------------------------------------------------------------------------------------------------------------------------------------------------------------------------------------------------------------------------------------------------------------------------------------------------------------------------------------------------------------------------------------------------------------------------------------------------------------------------------------------------------------------------------------------------------------------------------------------------------------------------------------------------------------------------------------------------------------------------------------------------------------------------------------------------------------------------------------------------------------------------------------------------------------------------------------------------------------------------------------------------------------------------------------------------------------------|
| Cluster II  | <p>0610040J01Rik, 1110008F13Rik, 1600014C10Rik, 2310022A10Rik, 2610507I01Rik, 4833407H14Rik, 6430548M08Rik, 9330175E14Rik, A430078G23Rik, A530064D06Rik, AB124611, Abca3, Abca6, Abca7, Abcc4, Abcd2, Abtb1, Acaa2, Acap3, Ace, Acss2, Add3, Adipor2, Adssl1, AI467606, Aim1, Akap13, Akt1, Alas2, Aldh1b1, Aldh2, Amotl2, Ampd3, Ankle2, Anxa7, Ap1m1, Ap1s2, Ap3m1, Apbb1ip, Apobr, Aprt, Arhgap23, Arhgap24, Arhgap26, Arhgap30, Arhgap9, Arhgdib, Arhgef1, Arhgef10l, Arhgef37, Arhgef4, Arid3a, Arl6ip5, Armc3, Arpc5, Arpc5l, Arsg, Asap1, Atg4d, Atg7, Atp1b3, Atp2a3, Atp2b4, Atrnl1, B3galnt2, B3galt4, B430306N03Rik, BC028528, BC051226, Bex6, Bid, Bin2, Bmf, Brpf1, Btla, C1galt1, C1galt1c1, C3, Camkk2, Capn2, Card19, Card9, Casp2, Cast, Cbx8, Ccdc125, Ccdc180, Ccdc88c, Ccnj, Cd177, Cd180, Cd300lg, Cd37, Cd52, Cdc42ep3, Cdc42ep4, Cdc42se1, Cdkn2d, Ceacam1, Ceacam19, Cecr5, Celsr3, Cgnl1, Chfr, Chil3, Chst12, Ckap4, Clec2i, Clmn, Cmas, Cmpk1, Cnr2, Cpt1a, Crybb1, Ctdspl, Ctps2, Ctse, Cyp2ab1, Cyp39a1, Cyp4f16, D1Ertd622e, Daxx, Dbi, Dbnl, Ddit4, Ddx28, Def6, Degs1, Dgka, Dgkg, Diaph1, Dleu2, Dna2, Dnah12, Dnah8, Dock2, Dstn, Dusp3, Dyrk3, E2f2, Ear2, Eif2ak2, Eif4ebp1, Elmo2, Emilin2, Eno1, Eno3, Eyt1, Ethe1, F10, F13a1, F5, Fam129b, Fam160a2, Fam32a, Fam49a, Fam65b, Fam83a, Fam96a, Fas, Fbx12, Fbx15, Fbxo4, Fem1a, Fgr, Fis1, Fkbp1b, Flna, Flot2, Flt1, Fmnl1, Fn1, Frat1, Frat2, Fry, Fut7, Fzd4, G6pdx, Gad1-ps, Galns, Gda, Glud1, Gm10384, Gm14326, Gm14548, Gm16194, Gm1673, Gm17354, Gm17767, Gm20559, Gm21975, Gm28875, Gm8369, Gm9733, Gngt2, Gpr141, Gpr15, Gramd3, Grk5, Grk6, Gucd1, Gyg, H13, H2-T24, H3f3a, Hba-a1, Hbb-bs, Hdac10, Helz2, Herc4, Hgsnat, Hhex, Hlcs, Hmha1, Hopx, Hp, Hsd11b1, Hsd17b10, Hsh2d, I830127L07Rik, Ict1, Ifit1bl1, Ifitm3, Ifitm6, Ifngr1, Ikbkb, Ikzf1, Il17ra, Il31ra, Inf2, Ip6k3, Ipmk, Itga1, Itgb2, Jazf1, Kcnab2, Kcnq3, Kctd10, Kctd20, Klc1, Klf10, Klf13, Klhl12, Klhl2, Klhl5, Klrb1f, Kpna2, Krt80, Kxd1, L1cam, Lamtor4, Lbp, Lgals3, Lira6, Lmf1, Lmo1, Lmo4, Lpcat4, Lrp1, Lrrc20, Lrrc8b, Lrrfip2, Ly6c2, Ly6i, Lyl1, Lyz2, Map2k1, Map4k4, Mars2, Mboat7, Mbp, Mcemp1, Mcf2l, Mcrs1, Me2, Megf9, Met, Mettl7a1, Mfsd14b, Mfsd7a, Mfsd7b, Mgst1, Mid1ip1, Mmp8, Mocs1, Mpnd, Mrpl30, Mrpl33, Ms4a4c, Ms4a8a, Msantd3, Msn, Msrb1, Myo18a, Myo1f, Myo1g, Myo1h, Myo1i, Naddk, Naip2, Ndrgr1, Ndufaf7, Nedd9, Nfam1, Nfe2, Nhsl2, Nkiras2, Nsf, Nupr1, Nxpel-ps, Oas3, Obfc1, Ogt, Orai2, P2ry1, Padi4, Paqr3, Pgam1, Pgd, Pgl1, Pi16, Pik3r6, Pitpna, Pkm, Plcb1, Plcg2, Plec, Plod3, Plp2, Plxnb2, Pnkp, Polr2e, Ppp1r15b, Ppp1r2, Ppp2r5a, Pqlc3, Prkab2, Prkce, Prkch, Prkx, Prr13, Prr5l, Prrc1, Prtn3, Psm7, Psmb3, Psm8, Pstpip1, Ptgir, Ptpn1, Ptpro, Pyhin1, Rab27a, Rab29, Rab36, Rab3d, Rab44, Rabgap1l, Rac2, Rap1a, Rap2a, Rara, Rarg, Rasa3, Rasgrp2, Rasgrp4, Rassf5, Rbks, Rbm43, Rem1, Rgs14, Rgs19, Rhoq, Rnf144a, Rras, S100a4, S100a6, S1pr4, S1pr5, Samhd1, Sbk1, Sell, Sephs2, Sept9, Serpinb10, Serpinb1a, Sfxn3, Sh2d3c, Sh3bp5, Shfm1, Shisa5, Sigmar1, Sipa1l3, Sirpb1b, Sirpb1c, Slc22a15, Slc22a4, Slc25a37, Slc35c1, Slc44a2, Slc8b1, Slfn1, lfn2, Slfn3, Slfn4, Slfn5, Slfn8, Slk, Slpi, Smim5, Smpdl3a, Snap29, Sntb2, Snx1, Sort1, Sp100, Spata13, Spn, Spryd4, Spsb4, St3gal4, Stat5a, Stat5b, Stk10, Stk24, Stk38, Stom, Stx11, Svit, ync3, Taldo1, Tbc1d2, Tcof1, Tdrd7, Thap11, Ticam2, Tirap, Tm9sf4, Tmc8, Tmem156, Tmem164, Tmem165, Tmem167, Tmem184b, Tmem38b, Tmem43, Tmem71, Tmpo, Tnfrsf21, Tnfrsf8, Tnfrsf13, Tnfrsfm13, Tpd52, Trem3, Trim16, Trim30b, Tspan14, Tspan17, Tspan5, Tspo, Tstd3, Ttc7, Tusc1, Tyk2, Ugt1a7c, Uhrf1bp1l, Unc119, Utp14a, Vamp1, Vcan, Vnn3, Ywhab, Zbtb42, Zfc3h1, Zfp217, Zfp706, Zfp971, Znhit1</p> |
| Cluster III | <p>0610009O20Rik, 2810417H13Rik, Abca1, Alms1, Ankrd26, Arf4, Arhgap22, Arhgap5, Arhgef39, Arhgef40, Arl5b, Asf1b, Atf3, Birc5, Blnk, Brca1, Btbd3, Btg1, Bub1, Casc5, Cass4, Ccdc112, Ccl2, Ccl5, Ccnb1, Ccnb2, Ccnd1, Ccnf, Ccrl2, Cd14, Cd36, Cd69, Cd74, Cdc20, Cdca2, Cdca3, Cdca8, Cdk1, Cenpe, Cenpf, Cep55, Chaf1a, Chd5, Cit, Ckap2l, Ckb, Clec10a, Clec47a, Clec7a, Coq10b, Csrnp1, Csrp1, Ctnnd2, Cxcr3, Cxcr4, Dbf4, Dlgap5, Dnajb4, Dnajb9, Dnmt3a, Dok2, Dsn1, Dusp10, Dusp2, Dusp5, E230013L22Rik, Ect2, Efh2d, Egr2, Eng, Errfi1, Etf1, Etv3, Exo1, Fanci, Fcrls, Fhl3, Figl1, Fnbp1l, Fndc7, Foxm1, Gins2, Gm29340, Gm43814, Gpr132, Gpr84, Gpsm1, Grasp, Gstcd, H2-Aa, H2-Ab1, H2-DMa, H2-DMb1, H2-DMb2, H2-Eb1, H2-Ob, H3f3b, Hbegf, Hdac9, Hepacam2, Hmnr, Ier2, Ier5, Ildr1, Igsf9, Il1a, Il1b, Il1rl1, Il1rn, Il6, Il7r, Ildr1, Itga6, Itgae, Itpkc, Kcnd1, Kdm6b, Kif11, Kif14, Kif15, Kif18b, Kif20a, Kif20b, Kif22, Kif2c, Kif4, Kifc1, Kit, Klf6, Klri1, Knstrn, Kpna3, Lig1, Lmnb2, Lrrc3, Ltbp3, Maff, Map3k8, March3, Marcks1l, Mcm2, Mcm3, Mcm5, Mcm6, Mcm7, Melk, Mki67, Mmp12, Mns1, Myc, Mycl, Ncapd2, Ncapg, Ncaph, Ndc80, Nectin2, Nek2, Nfatc2, Nfil3, Nfkbia, Nfkbie, Nfkbiz, Nlrp3, Nr4a1, Nr4a2, Nrip1, Nuf2, Nusap1, Nxpel5, Oat, Ocrl, P2ry10, Pak1, Paqr4, Phlda1, Phldb1, Pim1, Pkmyt1, Plau, Plek, Plk1, Plk4, Pltp, Pola1, Pold1, Pole, Ppfbp1, Prc1, Prim1, Ptger3, Ptpn7, Rab43, Rab6b, Rab7b, Rabgef1, Rad51, Rad51ap1, Rad54l, Rai14, Rapsn, Rbpj, Rel, Rnf141, Rnf150, Rnf19b, Rrad, Rrm1, Rrm2, Runx3, Serpinf1, Sgol2a, Shcbp1, Shmt2, Slc20a1, Slc43a3, Slc4a7, Smc2, Socs3, Sox12, Spc24, Spc25, Spdl1, Sqstm1, Stil, Stmn1, Syce2, Tacc3, Tagap, Tgif1, Tgif2, Tgoln1, Thap6, Ticrr, Tie1, Tlcd2, Tmem119, Tmem176a, Tmem176b, Tnf, Tnfrsf8, Tob2, Top2a, Tpx2, Trib1, Troap, Tspan32, Tuba1c, Tubb5, Tubb6, Tyms, Uhrf1, Ung, Vegfa, Wnk1, Zc3h12a, Zfand5, Zfp361l, Zfp395, Zfp703, Zwilch</p>                                                                                                                                                                                                                                                                                                                                                                                                                                                                                                                                                                                                                                                                                                                                                                                                                                                                                                                                                                                                                                                                                                                                                                                                                                                                                                                                                                                                                                                                                                                                                                                                                                                                                                                                                                                                                                     |
| Cluster IV  | <p>4930523C07Rik, A630033H20Rik, AA414768, Abhd5, Acot11, Acot7, Adam15, Adam8, Adgre5, Adora2a, Adss, Agpat2, Agpat4, Ahnak, AI839979, Alox5ap, Amd1, Ankrd28, Anxa1, Anxa2, Api5, Arhgap15, Arpc2, Atp10a, Atp11b, Atp5c1, B4galt5, Bbc3, BC005537, BC147527, Bcl11a, Bcl6, Bcr, Bri3bp, Bst1, Btf3, Bysl, Cagg, Ccdc109b, Ccl6, Ccl9, Ccnd3, Cd300lb, Cd47, Cers6, Clec12a, Clec4a3, Clint1, Cmpj, Cmpk2, Cnn2, Coq2, Coro1a, Crip1, Csgalnact2, Dennd4a, Diaph2, Dock8, E230016K23Rik, E330009J07Rik, Eif1ax, Eif3f, Eif3h, Eif3k, Eif3m, Emb, Eml2, Emp3, Eps8, Fam107b, Fam111a, Fam117b, Fam129a, Fam69a, Fam78b, Fam83f, Fam84b, Fcho1, Foxk1, Foxn2, Furin, Fxyd5, G430095P16Rik, Galnt9, Gapt, Gch1, Glipr2, Gltsr2, Gm11772, Gm13373, Gm15987, Gm1966, Gm43197, Gm8995, Gng10, Got2, Gpr35, Gpx1, Gria3, Gspt2, Gtf2h3, Gvin1, Gypc, Lhao, Hpse, Icam2, Ifi27l2a, Il6ra, Impa2, Iqgap1, Iqgap2, Irak3, Itga4, Itga5, Itgb7, Itpr1, Jarid2, Kbtbd11, Kctd1, Klf8, Kmt5a, Lbr, Ldhb, Ldlrad3, Limd1, Lpl, Lsp1, Lsr, Ltb4r1, Lyst, Map3k6, Map4k1, Map7, Mbnl3, Mboat1, Mfsd6, Mllt4, Mmp28, Mob3a, Mob3b, Ms4a4b, Mthfd1l, Myadm, N4bp1, Naaa, Naca, Napsa, Nat8l, Nbeal2, Ncor2, Nfkb1, Nin, Nrm, Nsa2, Padi2, Pdha1, Pdlim1, Pfkp, id1, Piezo1, Pkp3, Plac8, Plekhf2, Plekhg1, Plpp2, Polr1a, Prdx6, Prkag2, Ptgr1, Pygl, Rab31, Ramp1, Rap1gap2, Rassf3, Rassf4, Rbpms, Rell1, Rfx2, Rplp0, Rps15a, Rps27a, Rpsa, Ryr1, S100a10, S100a11, Samd9l, Samsn1, Sdad1, Selplg, Sept6, Sgms2, Sigirr, Sirpb1a, Siva1, Slc16a10, Slc16a3, Slc25a24, Slc2a6, Slc35e4, Slc52a3, Smpdl3b, Snrk, Sntb1, St3gal1, Steap3, Stk26, Stx3, Stxbp6, Sun1, Susd3, Svip, Tarm1, Thbd, Tiam2, Tkt, Tle3, Tmcc1, Tmem154, Tmsb10, Tnfrsf13os, Tnfrsf14, Tppp3, Traf3ip2, Trem2, Trem12, Trps1, Tuba1a, Unc119b, Upb1, Vcl, Vim, Vps13c, Wdr3, Xylt1, Ybx3, Zak, Zyx</p>                                                                                                                                                                                                                                                                                                                                                                                                                                                                                                                                                                                                                                                                                                                                                                                                                                                                                                                                                                                                                                                                                                                                                                                                                                                                                                                                                                                                                                                                                                                                                                                                                                                                                                                                                                                                                                                                                                                              |

Table S2. Gene lists by cluster (Continued)

| Cluster      | Genes                                                                                                                                                                                                                                                                                                                                                                                                                                                                                                                                                                                                                                                                                                                                                                                                                                                                                                                                                                                                                                                                                                                                                                                                                                                                                                                                                                                                                                                                                                                                                                                                                                                                                                                                                                                                                                                                                                                                                                                                            |
|--------------|------------------------------------------------------------------------------------------------------------------------------------------------------------------------------------------------------------------------------------------------------------------------------------------------------------------------------------------------------------------------------------------------------------------------------------------------------------------------------------------------------------------------------------------------------------------------------------------------------------------------------------------------------------------------------------------------------------------------------------------------------------------------------------------------------------------------------------------------------------------------------------------------------------------------------------------------------------------------------------------------------------------------------------------------------------------------------------------------------------------------------------------------------------------------------------------------------------------------------------------------------------------------------------------------------------------------------------------------------------------------------------------------------------------------------------------------------------------------------------------------------------------------------------------------------------------------------------------------------------------------------------------------------------------------------------------------------------------------------------------------------------------------------------------------------------------------------------------------------------------------------------------------------------------------------------------------------------------------------------------------------------------|
| Cluster V    | <i>1700017B05Rik, 2610203C22Rik, Abca5, Abcb1a, Acpp, Acy3, Ada, Adam33, Adamdec1, Adcy4, Adcy6, Adgb, Adrb1, Aga, Agpat3, Akr1b10, Aldh1l1, Aldh7a1, Als2cl, Angptl4, Ankrd24, Aplp1, Appl2, Arhgap10, Arhgef5, Arl4d, Armc8, Asap3, Aspa, AW011738, B3galt5, B4galnt4, B4galt4, Bach2os, Bcl7a, Bco2, Blvrb, Btnl7-ps, Cabp4, Camk2n1, Catip, Ccdc88b, Ccl24, Ccr1l1, Cd163, Cd200r1, Cd4, Chst14, Clip2, Clstn1, Cntrob, Col11a2, Coro2b, Cplx2, Cracr2b, Cryz, Csf1r, Csf2rb2, Cwc25, Cysltr2, Dcbld2, Dchs1, Dcun1d4, Dhcr7, Dkk3, Dlc1, Dnajc16, Dock9, Dpy19l3, Dsel, Dtnb, Dtx3, E230029C05Rik, Ecm1, Efemp2, Ehf, Eif2b2, Engase, Enpp2, Epb41l3, Epor, Esam, Eya4, Fam135a, Fam13a, Fam189a2, Fap, Fer, Firre, Fkbp14, Folr2, Fpr1, Fsd2, Galm, Ganc, Gas1, Gatsl3, Ggta1, Gkap1, Gm26947, Gm28884, Gng7, Gpm6b, Gpnmb, Gpr157, Gstm2, H2-M2, Havcr2, Hist1h1c, Hist1h2bc, Hjurp, Hoxb3, Hoxb5, Hsd17b7, Hunk, Idua, Igf2bp3, Ikzf2, Kcnj16, Kcp, Kctd6, Kif5c, Klhl13, Klra17, Kmo, Krba1, Lbh, Leprot, Lrp4, Lrrc4c, Man1c1, Marveld2, Mcfcd2, Mdfi, Med12l, Mfsd12, Mok, Mpp6, Mpzl2, Mroh2a, Mxra8, Mycbpap, Myo7a, Nceh1, Nckap5l, Neil2, Nfxl1, Nhlrc3, Ninl, Nisch, Nphp3, Npr1, Nucb2, Nudt16, Ocstamp, Odf2l, Oplah, Optn, Osbpl10, Osgin1, P2rx1, Paox, Pccb, Pcdhgb2, Pde1b, Pdgfc, Pecam1, Peli3, Phactr1, Phkg1, Pla2g15, Pla2g2d, Pla2g7, Plaur, Plcd1, Plekha8, Plekhh2, Plpp5, Pmvk, Ppfibp2, Prkca, Pter, Ptpn13, Pyroxd2, Rab11fip3, Rab11fip5, Rab34, Rcbtb2, Rell2, Renbp, Rgmb, Rhobtb3, Rhoc, Rnasel, Rnf43, RP24-185N3.3, Rsad1, Scarf2, Sema4b, Sept4, Sgk1, Sipa1l1, Slc12a2, Slc28a2, Slc38a6, Slc40a1, Slc44a5, Slc46a1, Slc4a8, Slc5a6, Slit3, Smad6, Smagp, Snx18, Spats2, Spry1, Srcin1, St5, Stard13, Svbp, Syt3, Tbc1d12, Tfpi, Thnsl2, Thrb, Tmeff1, Tmem144, Tmem150b, Tmem2, Tmem87a, Tmem87b, Tpp1, Trim6, Trpm2, Trpv4, Tspan13, Tspan8, Tssc4, Tuft1, Ubald1, Wnt4, Wtip, Zcchc14, Zdhhc1, Zdhhc14, Zfp105, Zfp579, Zfp622, Zfp773, Zfp820, Zkscan7, Zscan20</i> |
| Cluster VI   | <i>2410016O06Rik, 2500002B13Rik, 9330151L19Rik, A130014A01Rik, AI480526, Aldh3b1, Alkbh4, Ap5b1, Arhgef18, Atp1a3, Atp6v1b2, Bmx, Bre, Ccdc71l, Cd244, Clec4d, Csf3r, D230025D16Rik, Dclre1b, Dusp7, Gcnt2, Gm15922, Gpld1, Gramd4, Gsr, Gss, Gstm1, Idh1, Igsf6, Itgal, Itgb3, Klhl42, Mdm1, Mirt1, Mlst8, Mocos, Mpp1, Mst1r, Mtus1, Nlr1, Nod1, Nxe4, Pira2, Ppp2cb, Rhou, Rspo1, Sash3, Scarb1, Scn1a, Socs6, Sqrdl, Stk16, Tmc6, Tnfaip8l2, Tnfrsf1b, Traf3ip3, Tuba4a, Xdh, Zfp760, Zfp87, Zfyve9</i>                                                                                                                                                                                                                                                                                                                                                                                                                                                                                                                                                                                                                                                                                                                                                                                                                                                                                                                                                                                                                                                                                                                                                                                                                                                                                                                                                                                                                                                                                                      |
| Cluster VII  | <i>1700025G04Rik, Adora2b, Akt3, Alcam, Aplnr, Arsb, Ass1, Atp8b4, Ccr2, Clec4e, Coro2a, Eif3e, Esr1, Flt3, Foxred2, Glipr1, Kctd17, Lgals1, Lrrk2, Lyz1, Mthfd2, Nectin1, Nfix, Nup210, Olfm1, Olr1, Parvg, Prkd3, Psat1, Qpct, Rab11fip1, Rgs18, Rnf217, Satb1, Sema4a, Skint3, St3gal5, Synj2, Tnip3, Tpm4, Ttc39c, Uck2, Zbtb18</i>                                                                                                                                                                                                                                                                                                                                                                                                                                                                                                                                                                                                                                                                                                                                                                                                                                                                                                                                                                                                                                                                                                                                                                                                                                                                                                                                                                                                                                                                                                                                                                                                                                                                          |
| Cluster VIII | <i>Clec4b1, Id3, Retnla, Tnfsf9</i>                                                                                                                                                                                                                                                                                                                                                                                                                                                                                                                                                                                                                                                                                                                                                                                                                                                                                                                                                                                                                                                                                                                                                                                                                                                                                                                                                                                                                                                                                                                                                                                                                                                                                                                                                                                                                                                                                                                                                                              |
| Cluster IV   | <i>AI504432, Emp1, Rgag4, Slamf7, Spp1, Stat4, Traf1</i>                                                                                                                                                                                                                                                                                                                                                                                                                                                                                                                                                                                                                                                                                                                                                                                                                                                                                                                                                                                                                                                                                                                                                                                                                                                                                                                                                                                                                                                                                                                                                                                                                                                                                                                                                                                                                                                                                                                                                         |
| Cluster X    | <i>Cyfp2, Pstpip2, Rgs3, Wfdc17</i>                                                                                                                                                                                                                                                                                                                                                                                                                                                                                                                                                                                                                                                                                                                                                                                                                                                                                                                                                                                                                                                                                                                                                                                                                                                                                                                                                                                                                                                                                                                                                                                                                                                                                                                                                                                                                                                                                                                                                                              |
| Cluster XI   | <i>Ddhd1, Il12rb2</i>                                                                                                                                                                                                                                                                                                                                                                                                                                                                                                                                                                                                                                                                                                                                                                                                                                                                                                                                                                                                                                                                                                                                                                                                                                                                                                                                                                                                                                                                                                                                                                                                                                                                                                                                                                                                                                                                                                                                                                                            |
| Cluster XII  | <i>2900052N01Rik, Adam28, Adcy3, Adgra3, Angptl7, C2, Casc4, Ccsap, Cd209f, Cd209g, Cdc42bpa, Edil3, Fcna, Fkbp9, Fndc5, Fstl4, Fzd8, Gpr137b, Gpx3, Lgr4, P2ry2, Pkp4, Ppp1r9a, Ptpn14, Rims3, Rusc2, Serpinb6a, Slc1a3, Slc22a17, Slco4a1, Smim1, Spats2l, Spag, Spock1, St6galnac3, Tcaf1, Timd4, Uaca, Xlr, Zfp641</i>                                                                                                                                                                                                                                                                                                                                                                                                                                                                                                                                                                                                                                                                                                                                                                                                                                                                                                                                                                                                                                                                                                                                                                                                                                                                                                                                                                                                                                                                                                                                                                                                                                                                                       |
